# Supplementary material for: PDGFRβ regulates craniofacial development through homodimers and functional heterodimers with PDGFRα
Source: PubMed Central journal article supplement — Genes Dev. 2016 Nov 1;30(21):2443–58. doi: 10.1101/gad.288746.116 (PMC5131783; doi:10.1101/gad.288746.116), 2016-11-01

## Supplemental Material

### PDGFR $\beta$ regulates craniofacial development through homodimers and functional heterodimers with PDGFR $\alpha$

Katherine A. Fantauzzo and Philippe Soriano

#### Supplemental materials provided:

Supplemental Tables (1):

- Supplemental Table S1. Primers used in qRT-PCR analyses.

Supplemental Figure Legends

Supplemental Figures (3)

- Supplemental Figure S1, related to Figure 4. Extracellular matrix proteins with unaltered localization in *Pdgfra* mutant facial blebs.
- Supplemental Figure S2, related to Figure 4. Expression of extracellular matrix transcripts and proteins is unaltered in *Pdgfra* mutant cranial skin.
- Supplemental Figure S3, related to Figure 5. Antibodies used in the proximity ligation assay are highly specific.

## Supplemental Tables

**Supplemental Table S1.** Primers used in qRT-PCR analyses.

| Transcript     | Forward primer (5' to 3') | Reverse primer (5' to 3') |
|----------------|---------------------------|---------------------------|
| <i>mB2m</i>    | ACTGACCGGCCTGTATGCTA      | TGAAGGACATATCTGACATCTCTA  |
| <i>mPdgfra</i> | GATAGTGGAGAACCTGTTGC      | TCAGTCTCTGTTCCGTCCAGG     |
| <i>mPdgfrb</i> | CTACAATGCCATCAAGAGGG      | AACTCCTCATCTACCTGCTG      |
| <i>mltga6</i>  | GATGGGAGTCACTGTTGAGA      | ATCGCAGAACTCCAGTCTC       |
| <i>mltgb4</i>  | CTTTGATGCCATCCTGCAGA      | CCTGTGTCTTGTATTGGGTG      |
| <i>mLama3</i>  | GTCAACCTCACCTTGGATCT      | GCTTCTTGCCCAAAGTCTC       |
| <i>mLamb3</i>  | GTGGATTGACCAAACCTGAG      | CTCTTGTCTAGGTCCAGCTG      |
| <i>mLamc2</i>  | CCTGCAACTGCCACTCAAAG      | CTGGGTCACAGTCACACTTG      |
| <i>mCol4a1</i> | GTCTGGCTTCTGCTGCTCTT      | TTTTGTCCTGGTGGTCCATG      |
| <i>mFras1</i>  | GCTGGCGGAATTTGCAGTAT      | GCAATCCACAGCACTTCTCC      |
| <i>mFrem1</i>  | GTTGGGAACTCTCTCCACA       | CGGATGATGTTACAGTCTGG      |
| <i>mFrem2</i>  | CATGGCTACCTTCTCAACCT      | CAGTCGAAAATGCTGGTTGG      |
| <i>mHspg2</i>  | CTGAGGACACAGAGACTGTC      | GCTGTAATCAATGGACCGAG      |

## Supplemental Figure Legends

**Supplemental Figure S1, related to Figure 4.** Extracellular matrix proteins with unaltered localization in *Pdgfra* mutant facial blebs. (A-H') Expression of Keratin 14 (red; A-B'), Collagen type III (red; C-D'), Collagen type VII (red; E-F') and Hspg2 (red; G-H') as assessed by immunofluorescence analyses of E13.5 wild-type (A,A',C,C',E,E',G,G') versus *Pdgfra*<sup>GFP/GFP</sup> (B,B',D,D',F,F',H,H') craniofacial surface tissue. Localization of Keratin 14, Collagen type III, Collagen type VII and Hspg2 were unchanged between wild-type and mutant tissues. Nuclei were stained with DAPI (blue; A',B',C',D',E',F',G',H'). Scale bars, 100  $\mu$ m.

**Supplemental Figure S2, related to Figure 4.** Expression of extracellular matrix transcripts and proteins is unaltered in *Pdgfra* mutant cranial skin. (A) Bar graph depicting qRT-PCR values revealing reduced expression of *Lamb3* in E13.5 *Pdgfra*<sup>GFP/GFP</sup> whole cranial skin as compared to that of wild-type. No significant changes in transcript expression in the mutant samples were detected for *Itga6*, *Itgb4*, *Lama3*, *Lamc2*, *Col4a1*, *Fras1*, *Frem1*, *Frem2* and *Hspg2*. Data are presented as mean  $\pm$  SEM. n.s., not significant. \*,  $p < 0.05$ . (B-D) Western blot analysis of E13.5 whole cranial skin lysates revealed similar levels of Integrin  $\alpha 6$  (B), Collagen type IV (C) and Frem1 (D) protein between wild-type and *Pdgfra*<sup>GFP/GFP</sup> samples.  $\beta$ -tubulin served as a loading control. WB, Western blot.

**Supplemental Figure S3, related to Figure 5.** Antibodies used in the proximity ligation assay are highly specific. (A-B') Expression of PDGFR $\alpha$  (red) as assessed by

immunofluorescence analyses in E12.5 *Pdgfra<sup>fl/fl</sup>;Wnt1-Cre<sup>+/+</sup>* (A,A') and *Pdgfra<sup>fl/fl</sup>;Wnt1-Cre<sup>+Tg</sup>* (B,B') craniofacial sections. Note the significant reduction in fluorescence intensity detected in the mandibular mesenchyme of the conditional knock-out embryo. Expression of PDGFR $\alpha$  in the epithelium of both genotypes is non-specific. (C-D')

Expression of PDGFR $\beta$  (red) as assessed by immunofluorescence analyses in E13.5 *Pdgfrb<sup>fl/fl</sup>;Wnt1-Cre<sup>+/+</sup>* (C,C') and *Pdgfrb<sup>fl/fl</sup>;Wnt1-Cre<sup>+Tg</sup>* (D,D') craniofacial sections. Note the significant reduction in fluorescence intensity detected in the maxillary and mandibular mesenchyme of the conditional knock-out embryo. Nuclei were stained with DAPI (blue; A',B',C',D'). Md, mandible; Mx, maxilla. Scale bars, 100  $\mu$ m.

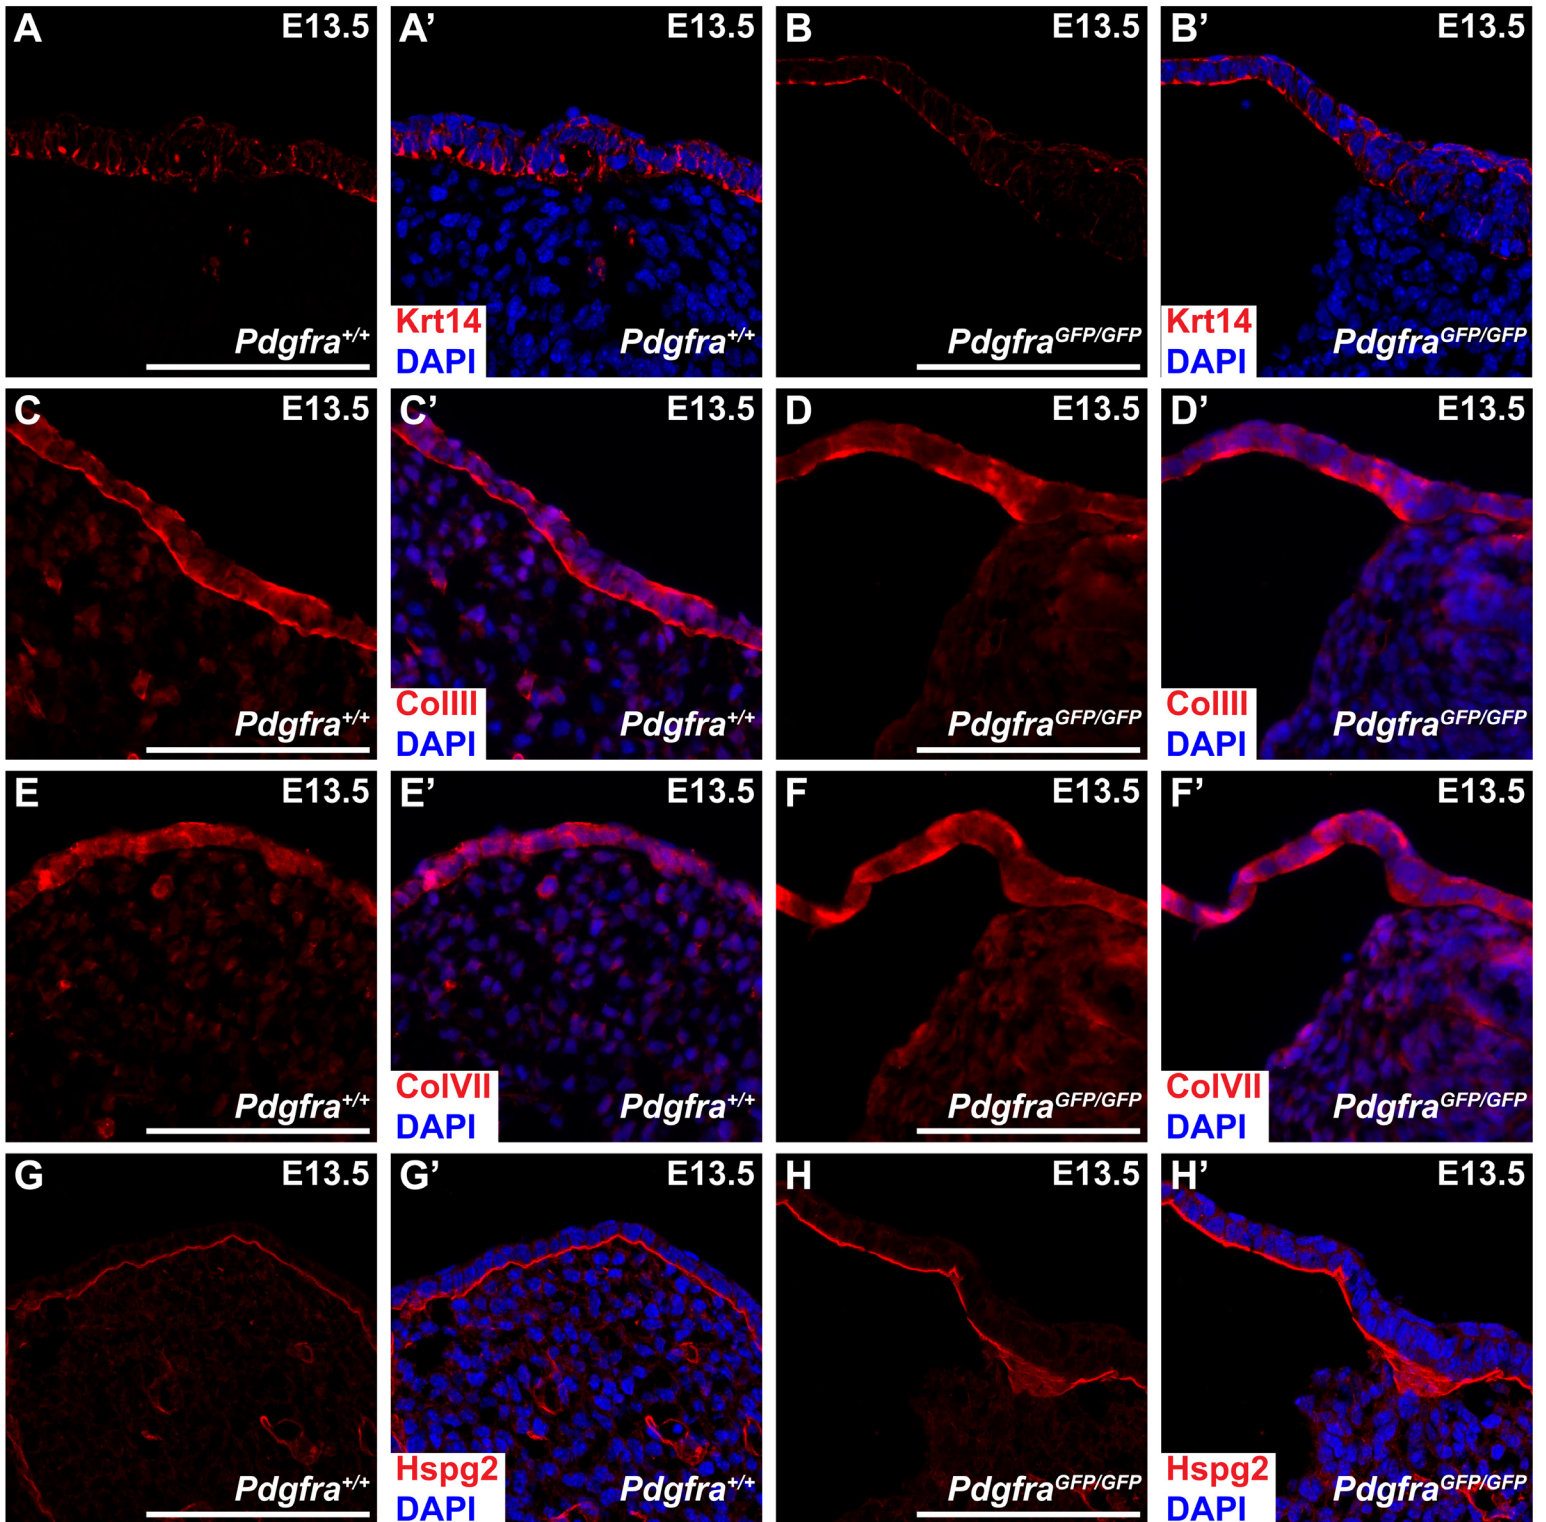

# Fantauzzo\_FigS2

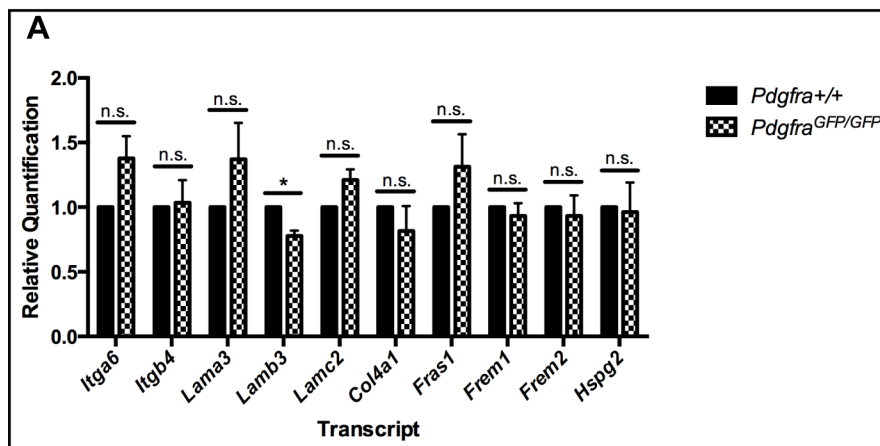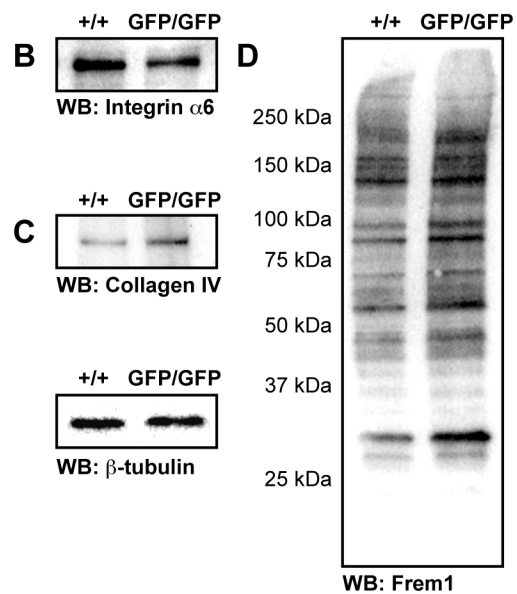

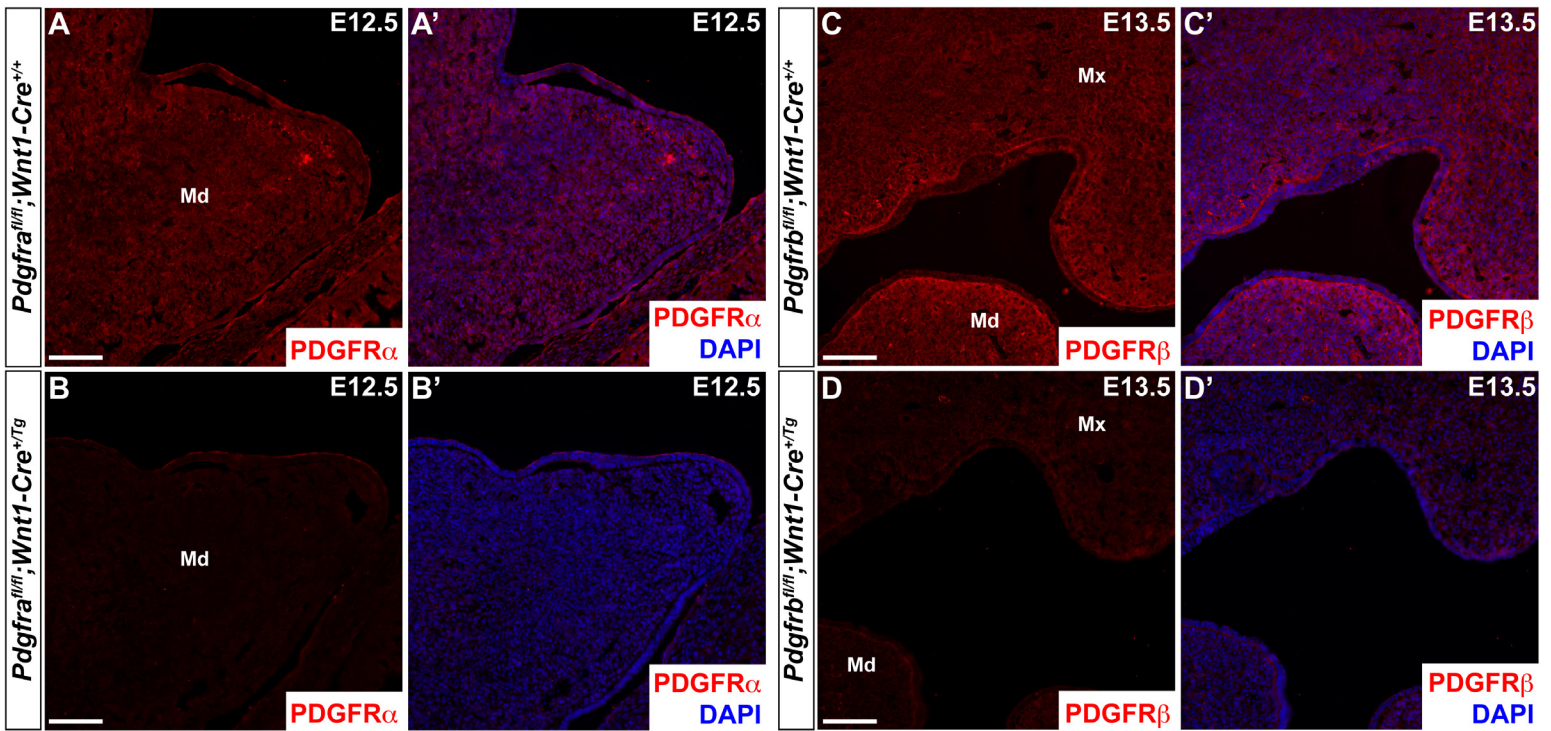

Supplement: supp_gad.288746.116_Supplemental_Material.pdf [file supp_gad.288746.116_Supplemental_Material.pdf]
